# Supplementary material for: Respiratory muscle training induces additional stress and training load in well-trained triathletes—randomized controlled trial
Source: Frontiers journal article supplement (doi:10.3389/fphys.2023.1264265), 2023-09-28
Supplement: Data_Sheet_1.pdf [file Data_Sheet_1.pdf]

## *Supplementary Material*

### **Respiratory muscle training induces additional stress and training load in well-trained triathletes - randomized controlled trial**

**Kowalski Tomasz<sup>1\*</sup>, Kasiak Przemysław Seweryn<sup>2\*</sup>, Rebis Kinga<sup>1</sup>, Klusiewicz Andrzej<sup>3</sup>, Granda Dominika<sup>4</sup>, Wiecha Szczepan<sup>3</sup>**

<sup>1</sup>Department of Physiology, Institute of Sport - National Research Institute, Warsaw, Poland

<sup>2</sup>3rd Department of Internal Medicine and Cardiology, Medical University of Warsaw, Warsaw, Poland

<sup>3</sup>Department of Physical Education and Health in Biala Podlaska, Jozef Pilsudski University of Physical Education, Faculty in Biala Podlaska, Poland

<sup>4</sup>Department of Nutrition Physiology and Dietetics, Institute of Sport - National Research Institute, Warsaw, Poland

**\*Correspondence:**

Kowalski Tomasz

[tomasz.kowalski@insp.pl](mailto:tomasz.kowalski@insp.pl)

Przemysław Seweryn Kasiak

[przemyslaw.kasiak@wum.edu.pl](mailto:przemyslaw.kasiak@wum.edu.pl)

# Reporting checklist for randomised trial.

Based on the CONSORT guidelines.

Schulz KF, Altman DG, Moher D, for the CONSORT Group. CONSORT 2010 Statement: updated guidelines for reporting parallel group randomised trials

|                           |                     | Reporting Item                                                                                                                                                 |     |
|---------------------------|---------------------|----------------------------------------------------------------------------------------------------------------------------------------------------------------|-----|
| <b>Title and Abstract</b> |                     |                                                                                                                                                                |     |
| Title                     | <a href="#">#1a</a> | Identification as a randomized trial in the title.                                                                                                             | ✓   |
| Abstract                  | <a href="#">#1b</a> | Structured summary of trial design, methods, results, and conclusions                                                                                          | ✓   |
| <b>Introduction</b>       |                     |                                                                                                                                                                |     |
| Background and objectives | <a href="#">#2a</a> | Scientific background and explanation of rationale                                                                                                             | ✓   |
| Background and objectives | <a href="#">#2b</a> | Specific objectives or hypothesis                                                                                                                              | ✓   |
| <b>Methods</b>            |                     |                                                                                                                                                                |     |
| Trial design              | <a href="#">#3a</a> | Description of trial design (such as parallel, factorial) including allocation ratio.                                                                          | ✓   |
| Trial design              | <a href="#">#3b</a> | Important changes to methods after trial commencement (such as eligibility criteria), with reasons                                                             | N/A |
| Participants              | <a href="#">#4a</a> | Eligibility criteria for participants                                                                                                                          | ✓   |
| Participants              | <a href="#">#4b</a> | Settings and locations where the data were collected                                                                                                           | ✓   |
| Interventions             | <a href="#">#5</a>  | The experimental and control interventions for each group with sufficient details to allow replication, including how and when they were actually administered | ✓   |
| Outcomes                  | <a href="#">#6a</a> | Completely defined prespecified primary and secondary outcome measures, including how and when they were assessed                                              | ✓   |

|                                                        |                      |                                                                                                                                                                                             |     |
|--------------------------------------------------------|----------------------|---------------------------------------------------------------------------------------------------------------------------------------------------------------------------------------------|-----|
| Sample size                                            | <a href="#">#7a</a>  | How sample size was determined.                                                                                                                                                             | ✓   |
| Sample size                                            | <a href="#">#7b</a>  | When applicable, explanation of any interim analyses and stopping guidelines                                                                                                                | N/A |
| Randomization -<br>Sequence generation                 | <a href="#">#8a</a>  | Method used to generate the random allocation sequence.                                                                                                                                     |     |
| 3                                                      |                      |                                                                                                                                                                                             |     |
| Randomization -<br>Sequence generation                 | <a href="#">#8b</a>  | Type of randomization; details of any restriction (such as blocking and block size)                                                                                                         |     |
| 3                                                      |                      |                                                                                                                                                                                             |     |
| Randomization -<br>Allocation concealment<br>mechanism | <a href="#">#9</a>   | Mechanism used to implement the random allocation sequence (such as sequentially numbered containers), describing any steps taken to conceal the sequence until interventions were assigned | ✓   |
| Randomization -<br>Implementation                      | <a href="#">#10</a>  | Who generated the allocation sequence, who enrolled participants, and who assigned participants to interventions                                                                            | ✓   |
| Blinding                                               | <a href="#">#11a</a> | If done, who was blinded after assignment to interventions (for example, participants, care providers, those assessing outcomes) and how.                                                   | ✓   |
| Blinding                                               | <a href="#">#11b</a> | If relevant, description of the similarity of interventions                                                                                                                                 | N/A |
| Statistical methods                                    | <a href="#">#12a</a> | Statistical methods used to compare groups for primary and secondary outcomes                                                                                                               | ✓   |
| Statistical methods                                    | <a href="#">#12b</a> | Methods for additional analyses, such as subgroup analyses and adjusted analyses                                                                                                            | N/A |
| Outcomes                                               | <a href="#">#6b</a>  | Any changes to trial outcomes after the trial commenced, with reasons                                                                                                                       | N/A |

## Results

|                                                    |                      |                                                                                                                                                |   |
|----------------------------------------------------|----------------------|------------------------------------------------------------------------------------------------------------------------------------------------|---|
| Participant flow diagram<br>(strongly recommended) | <a href="#">#13a</a> | For each group, the numbers of participants who were randomly assigned, received intended treatment, and were analysed for the primary outcome | ✓ |
|----------------------------------------------------|----------------------|------------------------------------------------------------------------------------------------------------------------------------------------|---|

|                          |                      |                                                                                                                                                   |     |
|--------------------------|----------------------|---------------------------------------------------------------------------------------------------------------------------------------------------|-----|
| Participant flow         | <a href="#">#13b</a> | For each group, losses and exclusions after randomization, together with reason                                                                   | N/A |
| Recruitment              | <a href="#">#14a</a> | Dates defining the periods of recruitment and follow-up                                                                                           | ✓   |
| Recruitment              | <a href="#">#14b</a> | Why the trial ended or was stopped                                                                                                                | N/A |
| Baseline data            | <a href="#">#15</a>  | A table showing baseline demographic and clinical characteristics for each group                                                                  | ✓   |
| Numbers analysed         | <a href="#">#16</a>  | For each group, number of participants (denominator) included in each analysis and whether the analysis was by original assigned groups           | ✓   |
| Outcomes and estimation  | <a href="#">#17a</a> | For each primary and secondary outcome, results for each group, and the estimated effect size and its precision (such as 95% confidence interval) | ✓   |
| Outcomes and estimation  | <a href="#">#17b</a> | For binary outcomes, presentation of both absolute and relative effect sizes is recommended                                                       | N/A |
| Ancillary analyses       | <a href="#">#18</a>  | Results of any other analyses performed, including subgroup analyses and adjusted analyses, distinguishing pre-specified from exploratory         | N/A |
| Harms                    | <a href="#">#19</a>  | All important harms or unintended effects in each group (For specific guidance see CONSORT for harms)                                             | N/A |
| <b>Discussion</b>        |                      |                                                                                                                                                   |     |
| Limitations              | <a href="#">#20</a>  | Trial limitations, addressing sources of potential bias, imprecision, and, if relevant, multiplicity of analyses                                  | ✓   |
| Interpretation           | <a href="#">#22</a>  | Interpretation consistent with results, balancing benefits and harms, and considering other relevant evidence                                     | ✓   |
| Registration             | <a href="#">#23</a>  | Registration number and name of trial registry                                                                                                    | ✓   |
| Generalisability         | <a href="#">#21</a>  | Generalisability (external validity, applicability) of the trial findings                                                                         | ✓   |
| <b>Other information</b> |                      |                                                                                                                                                   |     |
| Interpretation           | <a href="#">#22</a>  | Interpretation consistent with results, balancing benefits and                                                                                    | ✓   |

harms, and considering other relevant evidence

|              |                     |                                                                                 |     |
|--------------|---------------------|---------------------------------------------------------------------------------|-----|
| Registration | <a href="#">#23</a> | Registration number and name of trial registry                                  | ✓   |
| Protocol     | <a href="#">#24</a> | Where the full trial protocol can be accessed, if available                     | N/A |
| Funding      | <a href="#">#25</a> | Sources of funding and other support (such as supply of drugs), role of funders | ✓   |

The CONSORT checklist is distributed under the terms of the Creative Commons Attribution License CC-BY.
